# Supplementary material for: The emergence and origin of broader light emission from two-dimensional layered (C12H25NH3)2MnCl4 at low-temperatures
Source: Royal Society of Chemistry journal article supplement (doi:10.1039/d1tc00597a), 2021-01-01
Supplement: d1tc00597a1.pdf [file d1tc00597a1.pdf]

## Supplementary Information

### Emergence and origin of broader light emission from two-dimensional layered $(\text{C}_{12}\text{H}_{25}\text{NH}_3)_2\text{MnCl}_4$ at low-temperatures

Madhu Bochalya, Anand Nivedan, Sandeep Kumar, Arvind Singh, and Sunil Kumar\*

Department of Physics, Indian Institute of Technology Delhi, Hauz Khas, New Delhi 110016, INDIA

\*Corresponding author's email address: [kumarsunil@physics.iitd.ac.in](mailto:kumarsunil@physics.iitd.ac.in)

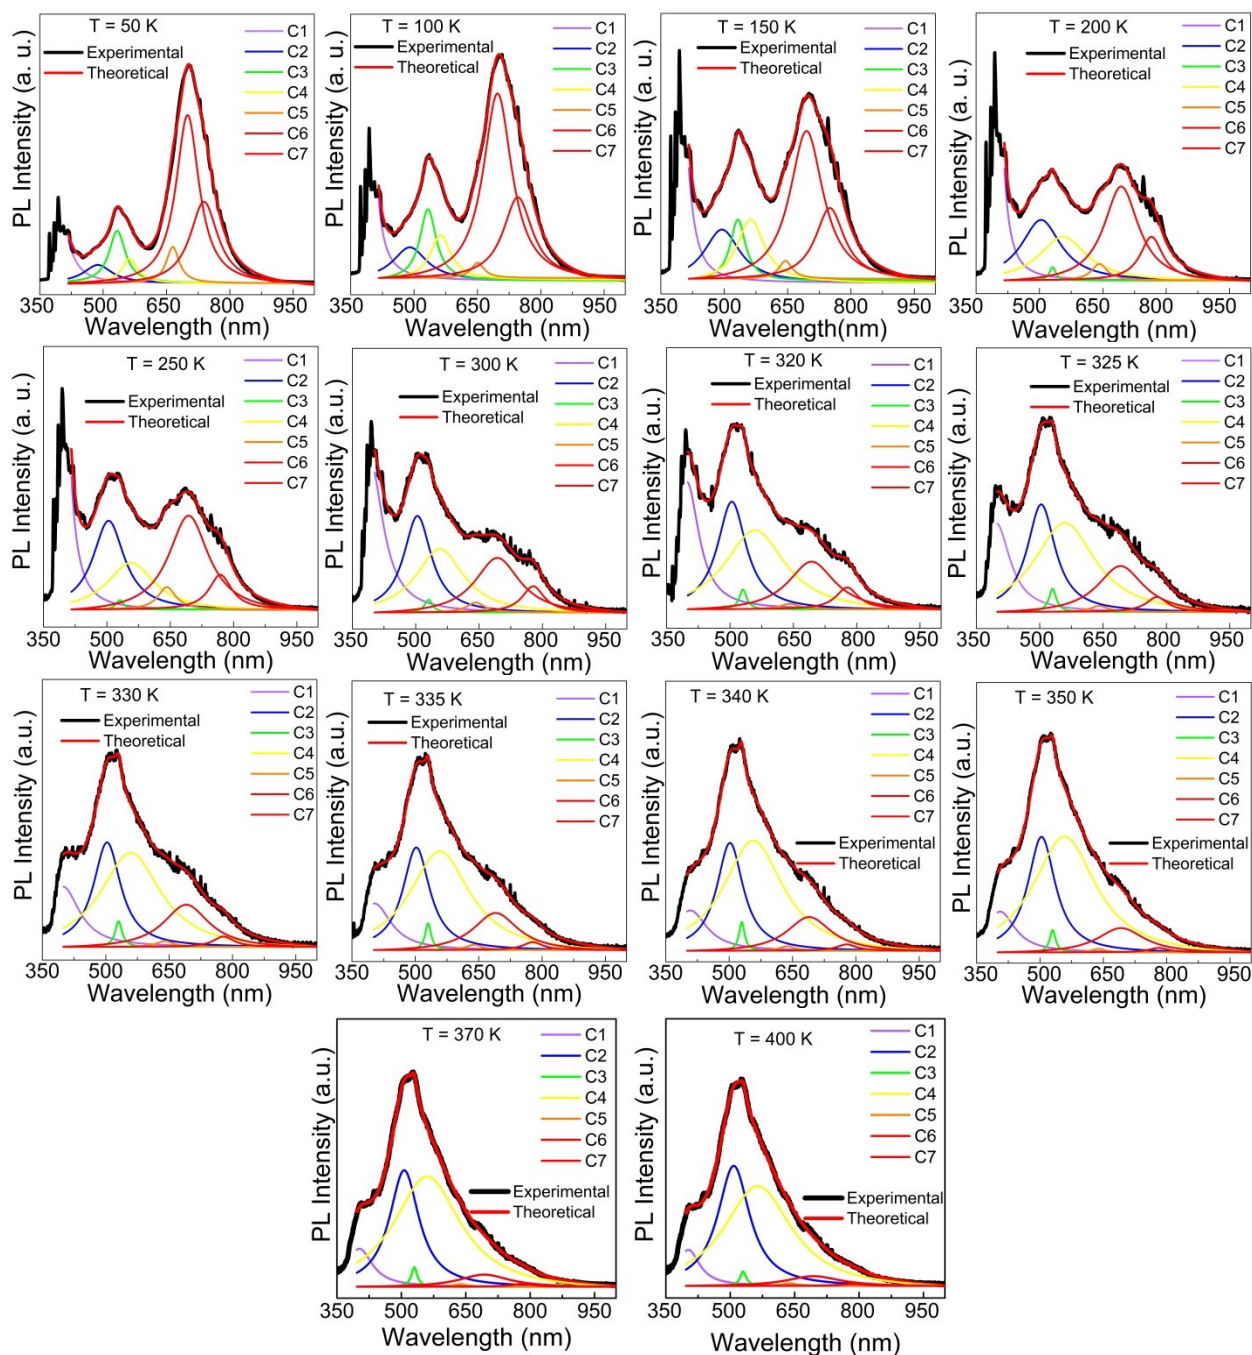

**Fig. S1:** Fitting of the PL spectra of  $(\text{C}_{12}\text{H}_{25}\text{NH}_3)_2\text{MnCl}_4$  at various temperatures ranging from 5 K to 400 K using the sum of Lorentzians.

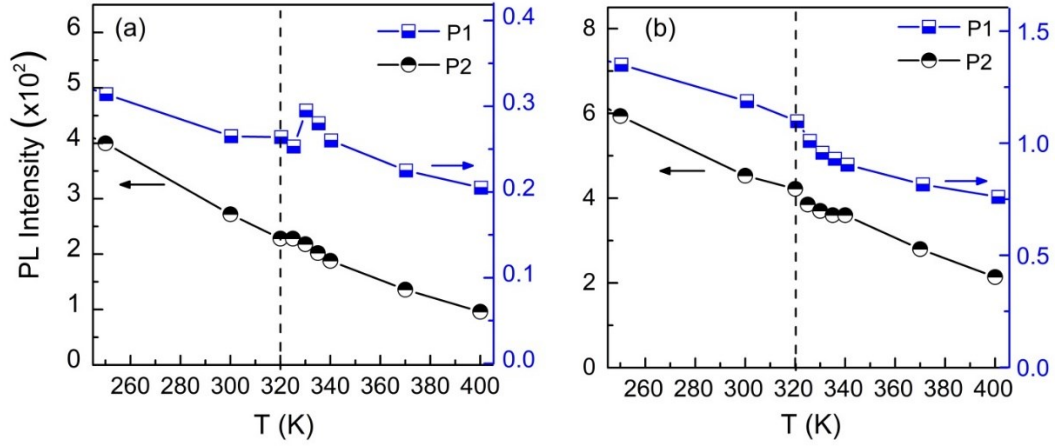

**Fig. S2:** Temperature dependence of the main emission peaks in the PL spectrum of (a)  $(C_{12}H_{25}NH_3)_2CuCl_4$  and (b)  $(C_{12}H_{25}NH_3)_2CuBr_4$  in the temperature range 250-400 K. The vertical dashed line marks the temperature at which a solid-solid phase transition is expected in these systems.

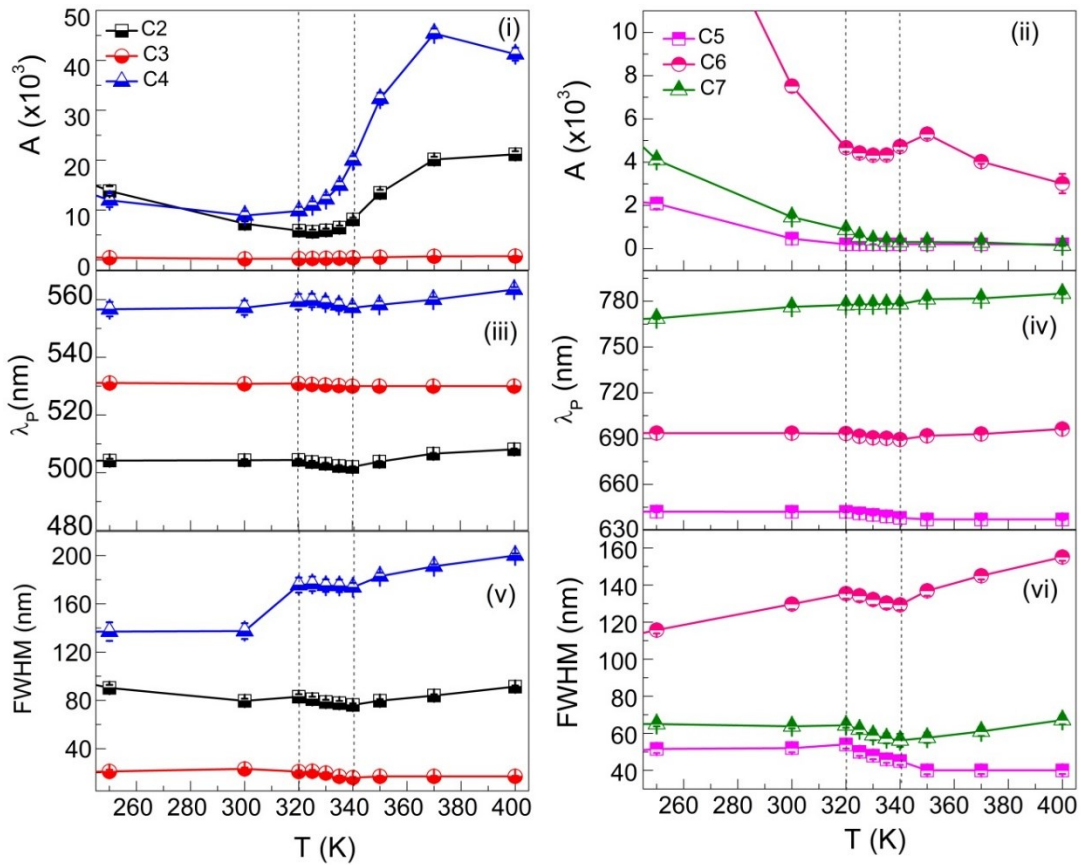

**Fig. S3:** Temperature dependence of the (i, ii) strength 'A', (iii, iv) peak wavelength ' $\lambda_p$ ' and (v, vi) FWHM of the Lorentzian peaks (C2 to C7) in the PL spectra of  $(C_{12}H_{25}NH_3)_2MnCl_4$ . Vertical dashed lines mark possible solid-solid phase transition temperatures.
